# Supplementary material for: Development and evaluation of a speech-generating AAC mobile app for minimally verbal children with autism spectrum disorder in Mainland China
Source: Springer Nature journal article supplement (doi:10.1186/s13229-017-0165-5), 2017-10-03

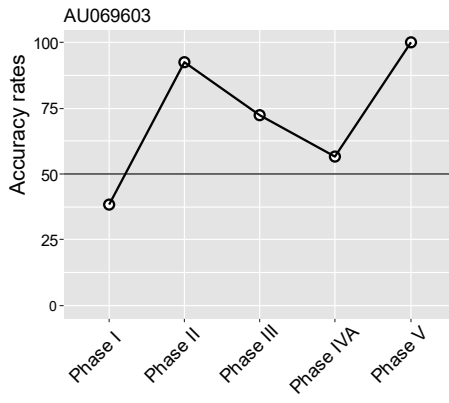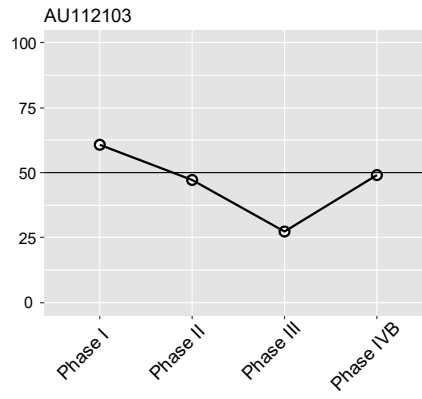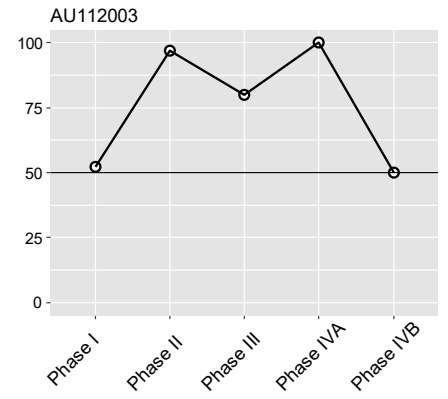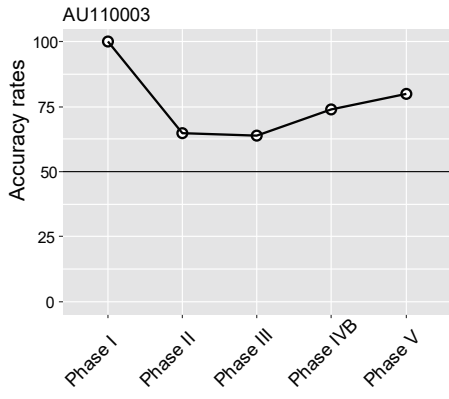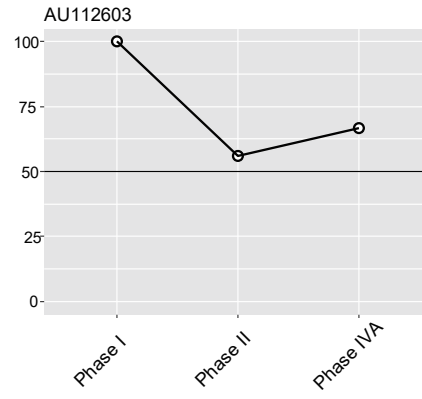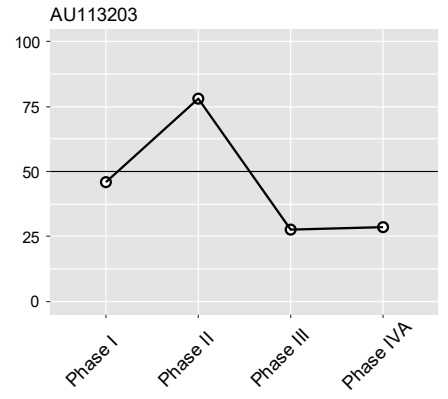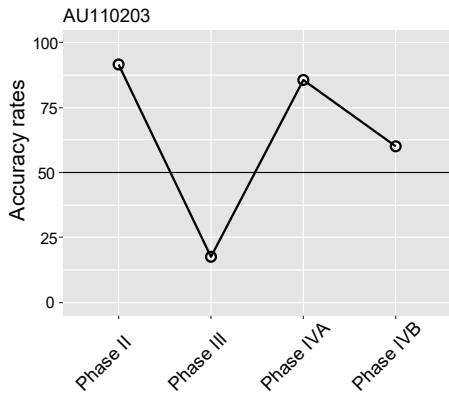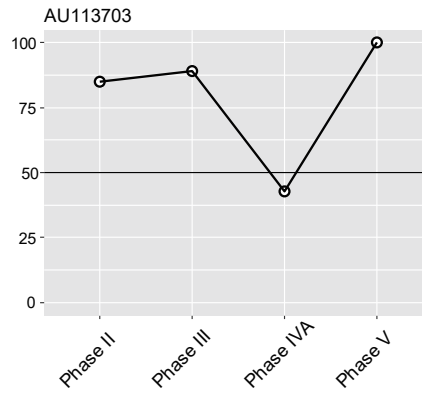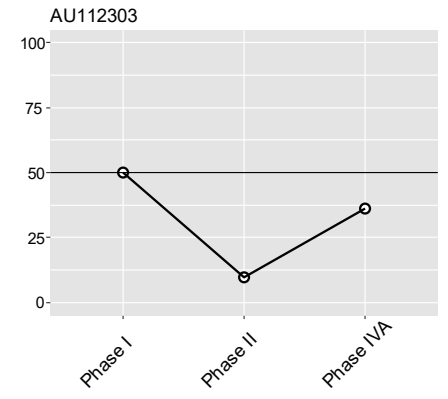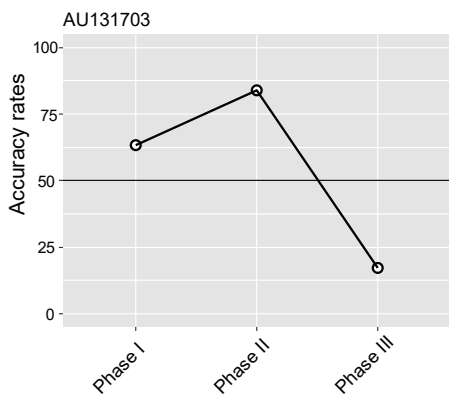

Supplement: MOESM2 [file 15101312]
